# Supplementary material
Source: MDPI journal article supplement (https://www.mdpi.com/2227-9709/6/1/4)
Supplement: s1 [file s1]

## Supplementary Analysis Results

### 1. Logistic Regression Results for D30 Using Text-Based Risk Score as a Single Predictor

Variables in the Equation

|                 | B     | S.E. | Wald  | df | Sig. | Exp(B) with 95% CI     |
|-----------------|-------|------|-------|----|------|------------------------|
| Text-based risk | 6.22  | 2.29 | 7.36  | 1  | 0.01 | 502.32 [5.61–44966.12] |
| Constant        | –9.40 | 1.94 | 23.52 | 1  | 0.00 |                        |

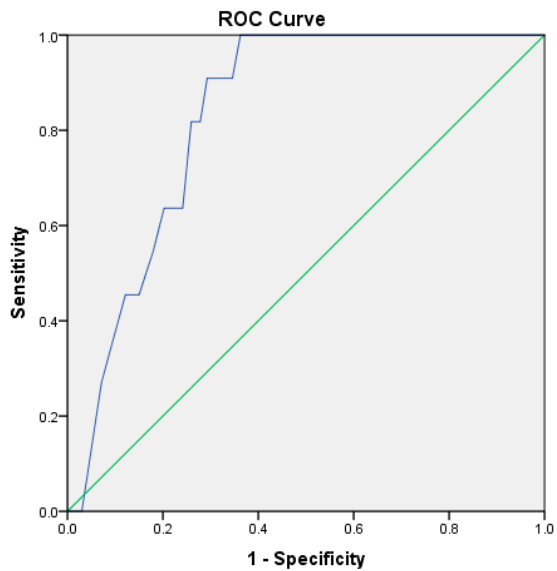

Area Under the Curve

| Area | Std. Error | Asymptotic Sig. | Asymptotic 95% Confidence Interval |             |
|------|------------|-----------------|------------------------------------|-------------|
|      |            |                 | Lower Bound                        | Upper Bound |
| 0.83 | 0.03       | 0.00            | 0.77                               | 0.89        |

### 2. Logistic Regression Results for D30 Using Structured Data Based Risk Factors

Variables in the Equation

|                   | B     | S.E. | Wald   | df | Sig. | Exp(B) with 95% CI   |
|-------------------|-------|------|--------|----|------|----------------------|
| Ventilator        | 2.85  | .98  | 8.51   | 1  | 0.00 | 17.21 [2.55–116.41]  |
| Bleeding Disorder | 4.18  | 1.27 | 10.93  | 1  | 0.00 | 65.50 [55.00–781.39] |
| Inotropic Support | 2.66  | .99  | 7.34   | 1  | 0.01 | 14.29 [2.09–97.87]   |
| Constant          | –6.50 | .61  | 114.26 | 1  | 0.00 | 0.00                 |

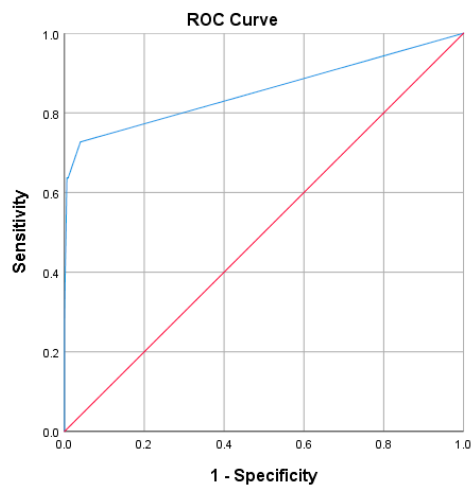

Diagonal segments are produced by ties.

#### Area Under the Curve

| Area | Std. Error <sup>a</sup> | Asymptotic Sig. <sup>b</sup> | Asymptotic 95% Confidence Interval |             |
|------|-------------------------|------------------------------|------------------------------------|-------------|
|      |                         |                              | Lower Bound                        | Upper Bound |
| 0.86 | 0.08                    | 0.00                         | 0.70                               | 1.00        |

### 3. Logistic Regression Results for D30 using both unstructured and structured data

#### Variables in the Equation

|                   | B with 95% CI          | Sig.  | Exp(B) with 95% CI      |
|-------------------|------------------------|-------|-------------------------|
| Text-based risk   | 6.28 (0.42, 12.98)     | 0.066 | 533.40 [1.94–146823.50] |
| Ventilator        | 2.07 (0.15, 3.99)      | 0.035 | 7.96 [1.58–40.00]       |
| Bleeding Disorder | 3.56 (1.35, 5.81)      | 0.002 | 35.30 [5.33–233.67]     |
| Inotropic Support | 2.29 (0.19, 4.39)      | 0.032 | 9.84 [1.70–57.11]       |
| Emergent Case     | 1.75 (0.03, 3.48)      | 0.046 | 5.76 [1.34–24.47]       |
| Constant          | –11.12 (–16.98, –5.26) | .0000 |                         |

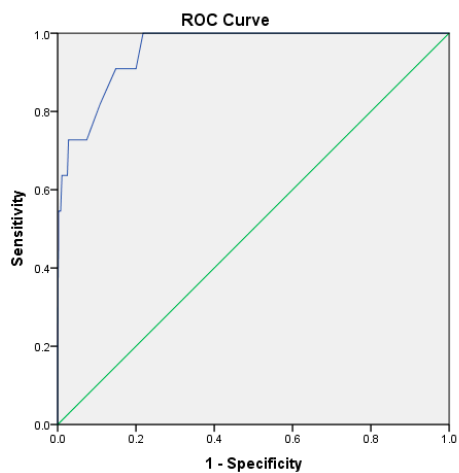

Diagonal segments are produced by ties.

#### Area Under the Curve

| Area | Std. Error <sup>a</sup> | Asymptotic Sig. | Asymptotic 95% Confidence Interval |             |
|------|-------------------------|-----------------|------------------------------------|-------------|
|      |                         |                 | Lower Bound                        | Upper Bound |
| 0.96 | 0.02                    | 0.00            | 0.92                               | 1.00        |

#### 4. Five-Fold Cross Validation Using the Five Predictors Selected in Model C

|       | AUC:Train-Test | Regression Coefficients |                 |            |                   |                   |               |
|-------|----------------|-------------------------|-----------------|------------|-------------------|-------------------|---------------|
|       |                | Constant                | Text-Based Risk | Ventilator | Bleeding Disorder | Inotropic Support | Emergent Case |
| Run 1 | 0.98 – 0.84    | –15.028                 | 9.320           | 3.684      | 4.015             | 2.599             | 2.395         |
| Run 2 | 0.95 – 1.00    | –10.307                 | 5.772           | 1.626      | 2.281             | 2.398             | 1.697         |
| Run 3 | 0.95 – 0.99    | –10.486                 | 5.657           | 1.105      | 4.079             | 3.325             | 2.044         |
| Run 4 | 0.95 – 1.00    | –11.294                 | 7.013           | 1.687      | 3.623             | 1.897             | 1.359         |
| Run 5 | 0.96 – 0.87    | –11.576                 | 6.504           | 2.505      | 3.854             | 1.678             | 1.500         |

#### 5. Logistic Regression Results for D90 Using Both Unstructured and Structured Data

##### Variables in the Equation

|                   | B     | S.E. | Wald  | df | Sig. | Exp(B) with 95% CI   |
|-------------------|-------|------|-------|----|------|----------------------|
| Ventilator        | 2.98  | 0.61 | 23.75 | 1  | .00  | 19.64 [5.93–65.04]   |
| Bleeding Disorder | 2.91  | 0.98 | 8.80  | 1  | .00  | 18.27 [2.68–124.52]  |
| Neonate           | 1.41  | 0.58 | 5.85  | 1  | .02  | 4.09 [1.31–12.80]    |
| Emergent Case     | 1.41  | 0.67 | 4.48  | 1  | .03  | 4.11 [1.11–15.25]    |
| Text-based risk   | 4.42  | 1.96 | 5.09  | 1  | .02  | 83.31 [1.79–3886.07] |
| Constant          | –9.23 | 1.68 | 30.25 | 1  | .00  | .00                  |

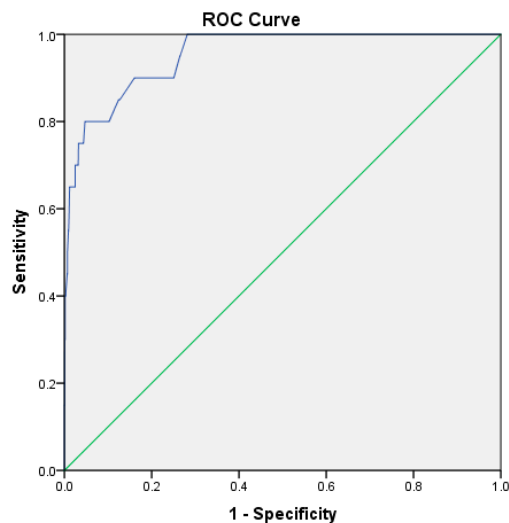

Diagonal segments are produced by ties.

#### Area Under the Curve

| Area | Std. Error | Asymptotic Sig. | Asymptotic 95% Confidence Interval |             |
|------|------------|-----------------|------------------------------------|-------------|
|      |            |                 | Lower Bound                        | Upper Bound |
| 0.95 | 0.02       | 0.00            | 0.92                               | 0.99        |

### 6. Logistic Regression Results for Postoperative Superficial Incisional Surgical Site Infection Using Both Unstructured and Structured Data

#### Variables in the Equation

|                 | B     | S.E. | Wald   | df | Sig. | Exp(B) with 95% CI |
|-----------------|-------|------|--------|----|------|--------------------|
| Text-based risk | 1.42  | 0.74 | 3.66   | 1  | 0.05 | 4.13 [0.97–17.66]  |
| Neonate         | 1.65  | 0.44 | 14.22  | 1  | 0.00 | 5.19 [2.21–12.21]  |
| Constant        | –5.49 | 0.51 | 115.29 | 1  | 0.00 |                    |

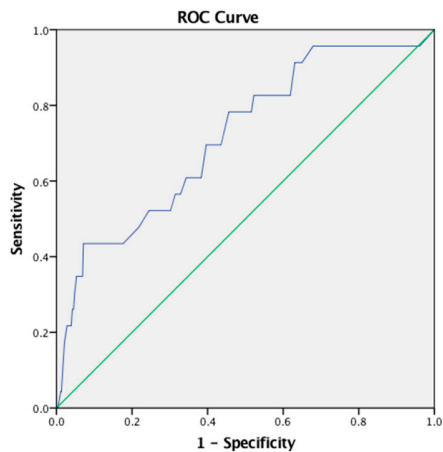

#### Area Under the Curve

| Area | Std. Error | Asymptotic Sig. | Asymptotic 95% Confidence Interval |             |
|------|------------|-----------------|------------------------------------|-------------|
|      |            |                 | Lower Bound                        | Upper Bound |
| 0.72 | 0.06       | 0.00            | 0.61                               | 0.83        |

### 7. Logistic Regression Results for Postoperative Superficial Incisional Surgical Site Infection using Both Unstructured and Structured Data

#### Variables in the Equation

|                 | B     | S.E. | Wald   | df | Sig. | Exp(B) with 95% CI |
|-----------------|-------|------|--------|----|------|--------------------|
| Text-based risk | 1.42  | 0.74 | 3.66   | 1  | 0.05 | 4.13 [0.97–17.66]  |
| Neonate         | 1.65  | 0.44 | 14.22  | 1  | 0.00 | 5.19 [2.21–12.21]  |
| Constant        | –5.49 | 0.51 | 115.29 | 1  | 0.00 | 0.00               |

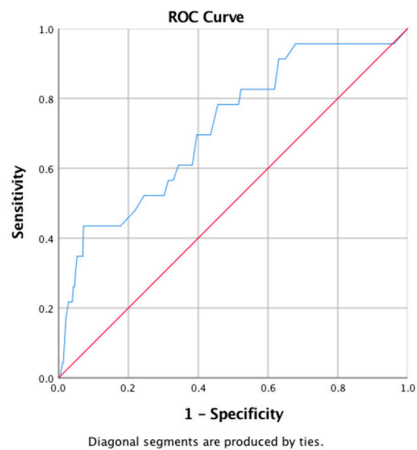

**Area Under the Curve**

| Area | Std. Error | Asymptotic Sig. | Asymptotic 95% Confidence Interval |             |
|------|------------|-----------------|------------------------------------|-------------|
|      |            |                 | Lower Bound                        | Upper Bound |
| 0.72 | 0.06       | 0.00            | 0.61                               | 0.83        |

## 8. Logistic Regression Results for Intra or Postoperative Blood Transfusion within 72 hours of Surgery Start Time Using Both Unstructured and Structured Data

**Variables in the Equation**

|                        | B     | S.E. | Wald   | df | Sig. | Exp(B) with 95% CI |
|------------------------|-------|------|--------|----|------|--------------------|
| Oxygen Support         | 1.06  | 0.40 | 7.092  | 1  | 0.01 | 2.87 [1.32–6.25]   |
| Neuromuscular Disorder | 1.31  | 0.24 | 30.42  | 1  | 0.00 | 3.72 [2.33–5.94]   |
| Hematologic Disorders  | 1.20  | 0.33 | 12.96  | 1  | 0.00 | 3.32 [1.73–6.38]   |
| Inotropic Support      | 2.53  | 0.62 | 16.76  | 1  | 0.00 | 12.52 [3.73–41.98] |
| Childhood Malignancy   | 0.52  | 0.25 | 4.116  | 1  | 0.04 | 1.67 [1.02–2.75]   |
| Urgent Case            | −1.95 | 0.74 | 7.014  | 1  | 0.01 | .14 [0.03–0.60]    |
| D30risk                | −2.24 | 0.35 | 40.35  | 1  | 0.00 | 0.106              |
| Constant               | −2.11 | 0.15 | 198.08 | 1  | 0.00 | 0.12               |

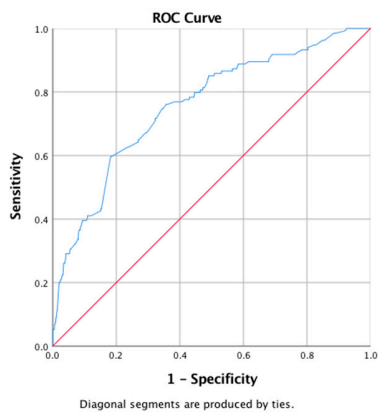

**Area Under the Curve**

| Area | Std. Error | Asymptotic Sig. | Asymptotic 95% Confidence Interval |             |
|------|------------|-----------------|------------------------------------|-------------|
|      |            |                 | Lower Bound                        | Upper Bound |
| 0.76 | 0.02       | 0.00            | 0.71                               | 0.80        |

## 9. Logistic Regression Results for Unplanned Readmission within 30 days of Surgery Using Both Unstructured and Structured Data

**Variables in the Equation**

|                 | B     | S.E. | Wald   | df | Sig. | Exp(B) with 95% CI |
|-----------------|-------|------|--------|----|------|--------------------|
| SIRS            | 0.89  | 0.43 | 4.32   | 1  | 0.04 | 2.43 [1.05–5.63]   |
| Sepsis          | 0.82  | 0.33 | 6.31   | 1  | 0.01 | 2.27 [1.20–4.49]   |
| Neonate         | −1.20 | 0.43 | 7.82   | 1  | 0.01 | 0.30 [0.13–0.70]   |
| Text-based risk | 1.54  | 0.29 | 28.14  | 1  | 0.00 | 4.67 [2.64–8.25]   |
| Constant        | −3.28 | 0.20 | 272.16 | 1  | 0.00 | 0.04               |

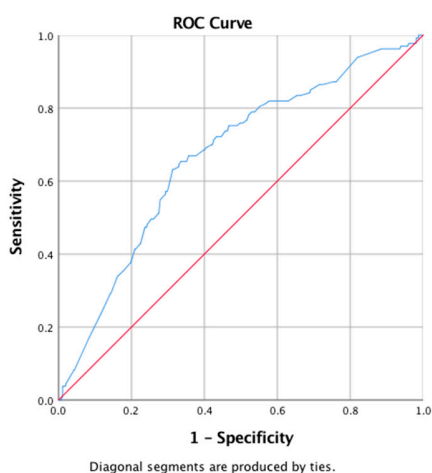

**Area Under the Curve**

| Area | Std. Error | Asymptotic Sig. | Asymptotic 95% Confidence Interval |             |
|------|------------|-----------------|------------------------------------|-------------|
|      |            |                 | Lower Bound                        | Upper Bound |
| 0.67 | 0.02       | 0.00            | 0.62                               | 0.72        |
