# Supplementary material
Source: MDPI journal article supplement (https://www.mdpi.com/2227-9709/6/1/4)
Supplement: s1 [file s1]

**Supplementary B: Top 100 Document types with text which were extracted from the EMR.**

| Doc Type                                | TOTAL   |
|-----------------------------------------|---------|
| -----                                   | -----   |
| Clinical Document                       | 311,960 |
| Depart Clinical Summary                 | 15,496  |
| Ambulatory Visit Summary Depart         | 13,905  |
| Office Visit Note                       | 11,251  |
| ED Clinical Summary                     | 11,232  |
| Pediatric Surgery                       | 10,915  |
| ENT                                     | 10,125  |
| pediatric surgery                       | 6,647   |
| Teacher Note                            | 6,462   |
| Progress Note                           | 5,582   |
| Surgery                                 | 5,292   |
| Parenteral Nutrition                    | 5,138   |
| General Message                         | 5,119   |
| Oto-HNS                                 | 4,903   |
| NICU Progress Note                      | 4,724   |
| Parenteral Nutrition Service (269-0112) | 4,603   |
| PICU Progress Note                      | 4,481   |
| LeBonheur Pathology Final Report        | 3,968   |
| NSR                                     | 3,896   |
| Progress                                | 3,619   |
| IMCU                                    | 3,348   |
| progress                                | 3,239   |
| Ortho                                   | 3,171   |
| attempt                                 | 3,090   |
| IMCU Daily Progress Note                | 2,917   |
| Team D Progress Note                    | 2,907   |
| AMB Visit Summary Depart                | 2,891   |
| Palliative Care Progress Note           | 2,841   |
| ortho                                   | 2,800   |
| Team A Progress Note                    | 2,750   |
| follow up                               | 2,674   |
| PT note                                 | 2,592   |
| Parenteral Nutrition (269-0112)         | 2,573   |
| Discharge Summary                       | 2,417   |
| OtoHNS                                  | 2,396   |
| Team B Progress Note                    | 2,386   |
| IMCU PN                                 | 23,17   |
| IMCU daily                              | 2,268   |
| general surgery                         | 2,223   |
| Parenteral Nutrition 269-0112           | 2,172   |
| Neurology                               | 2,081   |
| Team C Progress Note                    | 1,962   |
| IP-D                                    | 1,916   |
| Discharge                               | 1,884   |
| surgery                                 | 1,845   |
| MNT Follow Up                           | 1,827   |
| EEG                                     | 1,693   |
| discharge                               | 1,692   |
| Inpatient ST Progress Note              | 1,676   |
| Discharge Planning                      | 1,647   |
| Attempt                                 | 1,606   |
| Pulmonology                             | 1,574   |

|                                          |       |
|------------------------------------------|-------|
| Urology                                  | 1,560 |
| DS                                       | 1,470 |
| Pulmonology Attending Note               | 1,469 |
| Teacher note                             | 1,458 |
| Trauma NP                                | 1,450 |
| PRS                                      | 1,418 |
| PICU Daily Progress Note                 | 1,380 |
| up date                                  | 1,375 |
| IMCU Daily PN                            | 1,321 |
| PICU Daily Note                          | 1,244 |
| Pet Therapy                              | 1,241 |
| Peds Surgery                             | 1,221 |
| Peds Surg                                | 1,203 |
| Contact                                  | 1,198 |
| NSx                                      | 1,150 |
| Daily Progress Note                      | 1,148 |
| NICU                                     | 1,134 |
| neurosurgery staff                       | 1,133 |
| Assessment                               | 1,117 |
| Ped Nephrology                           | 1,094 |
| Cardiology                               | 1,066 |
| FEFH                                     | 1,066 |
| CVICU Progress Note                      | 1,035 |
| tx note                                  | 1,033 |
| peds surgery                             | 1,024 |
| PICU Accept Note                         | 1,023 |
| Neurosurgery                             | 978   |
| Abdominal pain                           | 962   |
| Team D PN                                | 937   |
| Teaching-Supervisory Addendum-Expand *ED | 928   |
| GI Progress Note                         | 924   |
| Fever                                    | 904   |
| Plastic Surgery                          | 897   |
| IMCU note                                | 887   |
| Consult                                  | 876   |
| ID Progress Note                         | 869   |
| Neurosurgery staff                       | 855   |
| Neurosurgery NP note                     | 844   |
| GI Daily Note                            | 837   |
| Vomiting                                 | 823   |
| nsr                                      | 821   |
| NICU Daily Progress Note                 | 820   |
| DC Planning                              | 813   |
| Pediatric Nephrology                     | 798   |
| Cardiology Office Visit Note             | 790   |
| GI                                       | 782   |
| Parenteral Nutrition Service             | 769   |
| IP-D PT Note                             | 759   |

Note that this study utilizes only preoperative text notes. Any post-operative document in the list above were belong the previous surgeries.
